# Supplementary material for: tRNA Derivatives in Multiple Myeloma: Investigation of the Potential Value of a tRNA-Derived Molecular Signature
Source: MDPI journal article supplement (doi:10.3390/biomedicines9121811), 2021-12-01
Supplement: s1 [file s1]

**Table 2.** Associations between the status of each tRF and the chromosomal aberration (+1q).

| tRF status                          | Total | Chromosomal aberration (+1q) |            | <i>P</i> value <sup>1</sup> |
|-------------------------------------|-------|------------------------------|------------|-----------------------------|
|                                     |       | Presence                     | Absence    |                             |
| <b>i-tRF-Pro<sup>TGG</sup></b>      |       |                              |            |                             |
| Positive                            | 36    | 18 (50.0%)                   | 18 (50.0%) | 0.38                        |
| Negative                            | 18    | 6 (33.3%)                    | 12 (66.7%) |                             |
| <b>i-tRF-Glu<sup>CTC</sup></b>      |       |                              |            |                             |
| Positive                            | 37    | 18 (48.6%)                   | 19 (51.4%) | 0.37                        |
| Negative                            | 16    | 5 (31.2%)                    | 11 (68.8%) |                             |
| <b>i-tRF-His<sup>GTG</sup></b>      |       |                              |            |                             |
| Positive                            | 38    | 19 (50.0%)                   | 19 (50.0%) | 0.24                        |
| Negative                            | 16    | 5 (31.2%)                    | 11 (68.8%) |                             |
| <b>i-tRF-Gly<sup>GCC</sup></b>      |       |                              |            |                             |
| Positive                            | 22    | 14 (63.6%)                   | 8 (36.4%)  | 0.027 <sup>2</sup>          |
| Negative                            | 32    | 10 (31.2%)                   | 22 (68.8%) |                             |
| <b>i-tRF-Phe<sup>GAA</sup></b>      |       |                              |            |                             |
| Positive                            | 32    | 17 (53.1%)                   | 15 (46.9%) | 0.17                        |
| Negative                            | 22    | 7 (31.8%)                    | 15 (68.2%) |                             |
| <b>3'-tRF-Leu<sup>AAG/TAG</sup></b> |       |                              |            |                             |
| Positive                            | 23    | 13 (56.5%)                   | 10 (43.5%) | 0.17                        |
| Negative                            | 31    | 11 (35.5%)                   | 20 (64.5%) |                             |

<sup>1</sup> Calculated using Fischer's exact test. <sup>2</sup> Italics indicate a significant *P* value.
