# Supplementary material for: tRNA Derivatives in Multiple Myeloma: Investigation of the Potential Value of a tRNA-Derived Molecular Signature
Source: MDPI journal article supplement (doi:10.3390/biomedicines9121811), 2021-12-01
Supplement: s1 [file s1]

**Table S1.** Subgrouping of the 76 MM patients based on the levels of each tRF in CD138+ plasma cells.

| <b>tRF status</b>                   | <b>Frequency</b> |
|-------------------------------------|------------------|
| <b>i-tRF-Pro<sup>TGG</sup></b>      |                  |
| Positive                            | 55 (72.4%)       |
| Negative                            | 21 (27.6%)       |
| <b>i-tRF-Glu<sup>CTC</sup></b>      |                  |
| Positive                            | 51 (67.1%)       |
| Negative                            | 25 (32.9%)       |
| <b>i-tRF-His<sup>GTG</sup></b>      |                  |
| Positive                            | 54 (71.1%)       |
| Negative                            | 22 (28.9%)       |
| <b>i-tRF-Gly<sup>GCC</sup></b>      |                  |
| Positive                            | 34 (44.7%)       |
| Negative                            | 42 (55.3%)       |
| <b>i-tRF-Phe<sup>GAA</sup></b>      |                  |
| Positive                            | 48 (63.2%)       |
| Negative                            | 28 (36.8%)       |
| <b>3'-tRF-Leu<sup>AAG/TAG</sup></b> |                  |
| Positive                            | 37 (48.7%)       |
| Negative                            | 39 (51.3%)       |
